# Supplementary material
Source: MDPI journal article supplement (doi:10.3390/horticulturae12030311)
Supplement: s1 [file Supplementary Figure.pdf › Supplementary Figure.pdf]

VaccDscalf7-snap-gene-165.31-mRNA-1  
VaccDscalf2-snap-gene-338.36-mRNA-1  
VaccDscalf46-augustus-gene-173.21-mRNA-1  
VaccDscalf43-snap-gene-35.20-mRNA-1  
VaccDscalf11-processed-gene-370.2-mRNA-1  
VaccDscalf1-processed-gene-362.10-mRNA-1  
VaccDscalf24-processed-gene-33.4-mRNA-1  
AILBD16  
AILBD20  
VaccDscalf26-augustus-gene-295.37-mRNA-1  
VaccDscalf21-augustus-gene-303.23-mRNA-1  
VaccDscalf29-augustus-gene-282.21-mRNA-1  
AILBD31  
VaccDscalf22-augustus-gene-36.36-mRNA-1  
VaccDscalf684-augustus-gene-0.6-mRNA-1  
AILBD18  
AILBD30  
AILBD19  
VaccDscalf41-augustus-gene-159.30-mRNA-1  
VaccDscalf40-snap-gene-170.38-mRNA-1  
VaccDscalf3-augustus-gene-122.27-mRNA-1  
VaccDscalf23-augustus-gene-125.22-mRNA-1  
VaccDscalf33-processed-gene-192.3-mRNA-1  
VaccDscalf29-augustus-gene-144.28-mRNA-1  
VaccDscalf21-augustus-gene-143.22-mRNA-1  
VaccDscalf19-processed-gene-46.9-mRNA-1  
VaccDscalf20-processed-gene-53.9-mRNA-1  
AILBD33  
AILBD17  
AILBD29  
AILBD14  
VaccDscalf43-processed-gene-35.4-mRNA-1  
VaccDscalf22-processed-gene-337.6-mRNA-1  
VaccDscalf46-processed-gene-173.1-mRNA-1  
VaccDscalf43-augustus-gene-35.18-mRNA-1  
VaccDscalf46-augustus-gene-173.19-mRNA-1  
VaccDscalf22-processed-gene-338.1-mRNA-1  
VaccDscalf47-processed-gene-165.0-mRNA-1  
VaccDscalf19-augustus-gene-33.32-mRNA-1  
VaccDscalf28-augustus-gene-322.38-mRNA-1  
VaccDscalf20-snap-gene-35.50-mRNA-1  
VaccDscalf48-augustus-gene-41.38-mRNA-1  
VaccDscalf4-processed-gene-374.17-mRNA-1  
VaccDscalf8-processed-gene-58.18-mRNA-1  
VaccDscalf9-processed-gene-353.12-mRNA-1  
AILBD13  
VaccDscalf15-snap-gene-302.37-mRNA-1  
VaccDscalf19-augustus-gene-371.24-mRNA-1  
VaccDscalf11-augustus-gene-316.23-mRNA-1  
VaccDscalf24-augustus-gene-62.35-mRNA-1  
AILBD15  
VaccDscalf43-snap-gene-90.31-mRNA-1  
VaccDscalf43-snap-gene-78.27-mRNA-1  
VaccDscalf22-snap-gene-288.44-mRNA-1  
VaccDscalf47-snap-gene-122.46-mRNA-1  
VaccDscalf19-processed-gene-39.2-mRNA-1  
VaccDscalf48-processed-gene-66.17-mRNA-1  
AILBD21  
VaccDscalf34-processed-gene-93.1-mRNA-1  
VaccDscalf17-processed-gene-288.7-mRNA-1  
VaccDscalf27-snap-gene-259.34-mRNA-1  
VaccDscalf27-processed-gene-357.1-mRNA-1  
AILBD8  
AILBD25  
VaccDscalf13-processed-gene-64.6-mRNA-1  
VaccDscalf30-snap-gene-343.78-mRNA-1  
VaccDscalf184-processed-gene-0.1-mRNA-1  
VaccDscalf109-processed-gene-4.4-mRNA-1  
VaccDscalf533-processed-gene-0.0-mRNA-1  
VaccDscalf27-processed-gene-175.6-mRNA-1  
AILBD6  
VaccDscalf31-processed-gene-95.5-mRNA-1  
VaccDscalf16-processed-gene-185.0-mRNA-1  
VaccDscalf7-processed-gene-249.7-mRNA-1  
AILBD36  
VaccDscalf13-augustus-gene-133.22-mRNA-1  
VaccDscalf2-processed-gene-68.5-mRNA-1  
VaccDscalf20-processed-gene-232.0-mRNA-1  
VaccDscalf32-snap-gene-236.36-mRNA-1  
AILBD10  
AILBD26  
AILBD28  
AILBD32  
AILBD30  
VaccDscalf19-augustus-gene-366.31-mRNA-1  
VaccDscalf24-augustus-gene-66.43-mRNA-1  
VaccDscalf11-augustus-gene-119.21-mRNA-1  
VaccDscalf15-augustus-gene-307.19-mRNA-1  
VaccDscalf28-augustus-gene-219.23-mRNA-1  
VaccDscalf214-augustus-gene-0.26-mRNA-1  
VaccDscalf19-augustus-gene-37.43-mRNA-1  
VaccDscalf20-snap-gene-36.38-mRNA-1  
AILBD12  
VaccDscalf26-augustus-gene-123.41-mRNA-1  
VaccDscalf33-snap-gene-217.28-mRNA-1  
AILBD4  
VaccDscalf701-augustus-gene-0.11-mRNA-1  
VaccDscalf76-augustus-gene-4.25-mRNA-1  
VaccDscalf82-augustus-gene-5.35-mRNA-1  
VaccDscalf24-snap-gene-56.35-mRNA-1  
VaccDscalf15-augustus-gene-334.23-mRNA-1  
VaccDscalf11-augustus-gene-345.33-mRNA-1  
AILBD3  
VaccDscalf47-processed-gene-81.24-mRNA-1  
VaccDscalf48-processed-gene-99.16-mRNA-1  
VaccDscalf22-augustus-gene-268.27-mRNA-1  
VaccDscalf43-augustus-gene-120.26-mRNA-1  
VaccDscalf15-augustus-gene-291.38-mRNA-1  
VaccDscalf24-augustus-gene-95.27-mRNA-1  
VaccDscalf19-snap-gene-337.60-mRNA-1  
AILBD1  
AILBD11  
AILBD3  
AILBD24  
VaccDscalf38-snap-gene-210.28-mRNA-1  
VaccDscalf39-snap-gene-237.29-mRNA-1  
VaccDscalf37-augustus-gene-69.35-mRNA-1  
VaccDscalf18-snap-gene-148.30-mRNA-1  
VaccDscalf15-snap-gene-54.23-mRNA-1  
VaccDscalf24-snap-gene-322.24-mRNA-1  
VaccDscalf15-snap-gene-31.32-mRNA-1  
VaccDscalf11-snap-gene-19.25-mRNA-1  
VaccDscalf44-snap-gene-228.39-mRNA-1  
VaccDscalf38-augustus-gene-108.31-mRNA-1  
VaccDscalf8-augustus-gene-311.38-mRNA-1  
VaccDscalf35-augustus-gene-242.35-mRNA-1  
VaccDscalf6-processed-gene-334.14-mRNA-1  
VaccDscalf13-augustus-gene-98.29-mRNA-1  
AILBD40  
VaccDscalf25-augustus-gene-297.32-mRNA-1  
VaccDscalf3-augustus-gene-111.23-mRNA-1  
VaccDscalf2-processed-gene-302.38-mRNA-1  
VaccDscalf14-augustus-gene-256.33-mRNA-1  
AILBD42  
AILBD41  
VaccDscalf3-augustus-gene-10.22-mRNA-1  
VaccDscalf14-augustus-gene-349.30-mRNA-1  
VaccDscalf2-augustus-gene-402.43-mRNA-1  
VaccDscalf7-processed-gene-227.1-mRNA-1  
VaccDscalf27-augustus-gene-208.18-mRNA-1  
VaccDscalf34-augustus-gene-147.23-mRNA-1  
VaccDscalf32-augustus-gene-258.34-mRNA-1  
VaccDscalf30-augustus-gene-254.23-mRNA-1  
AILBD38  
AILBD38  
AILBD37  
VaccDscalf23-augustus-gene-301.29-mRNA-1  
VaccDscalf1-augustus-gene-28.21-mRNA-1  
VaccDscalf40-augustus-gene-38.38-mRNA-1  
VaccDscalf12-augustus-gene-111.26-mRNA-1  
VaccDscalf40-snap-gene-40.23-mRNA-1  
VaccDscalf12-snap-gene-111.30-mRNA-1  
VaccDscalf23-processed-gene-300.4-mRNA-1  
VaccDscalf1-augustus-gene-28.20-mRNA-1  
VaccDscalf23-augustus-gene-301.29-mRNA-1  
VaccDscalf11-augustus-gene-29.36-mRNA-1  
VaccDscalf40-snap-gene-39.47-mRNA-1  
VaccDscalf33-processed-gene-301.5-mRNA-1  
VaccDscalf12-augustus-gene-111.25-mRNA-1  
VaccDscalf41-augustus-gene-29.37-mRNA-1  
VaccDscalf23-augustus-gene-301.30-mRNA-1  
VaccDscalf11-processed-gene-150.9-mRNA-1  
VaccDscalf271-processed-gene-0.10-mRNA-1  
VaccDscalf24-processed-gene-248.0-mRNA-1  
VaccDscalf312-processed-gene-0.5-mRNA-1  
AILBD9  
AILBD5  
AILBD8  
VaccDscalf32-augustus-gene-44.34-mRNA-1  
AILBD2  
VaccDscalf5-snap-gene-311.32-mRNA-1  
VaccDscalf8-augustus-gene-121.34-mRNA-1  
VaccDscalf1-augustus-gene-334.28-mRNA-1  
VaccDscalf10-augustus-gene-100.25-mRNA-1  
VaccDscalf8-augustus-gene-115.29-mRNA-1  
VaccDscalf36-augustus-gene-12.30-mRNA-1  
VaccDscalf27-augustus-gene-351.17-mRNA-1  
VaccDscalf34-processed-gene-17.4-mRNA-1  
AILBD22  
AILBD7  
VaccDscalf182-processed-gene-0.9-mRNA-1  
VaccDscalf53-processed-gene-175.15-mRNA-1  
VaccDscalf22-processed-gene-202.17-mRNA-1  
VaccDscalf6-processed-gene-363.14-mRNA-1  
AILBD27  
VaccDscalf54-augustus-gene-121.32-mRNA-1  
VaccDscalf17-processed-gene-253.5-mRNA-1  
VaccDscalf45-processed-gene-231.4-mRNA-1  
VaccDscalf27-augustus-gene-234.33-mRNA-1  
VaccDscalf16-augustus-gene-47.39-mRNA-1  
VaccDscalf7-augustus-gene-376.35-mRNA-1  
VaccDscalf18-snap-gene-351.45-mRNA-1  
VaccDscalf7-augustus-gene-376.31-mRNA-1  
VaccDscalf16-augustus-gene-46.42-mRNA-1  
VaccDscalf7-snap-gene-376.45-mRNA-1

**Fig. S1** Phylogenetic evolutionary tree of *LBD* genes in blueberry and Arabidopsis.  
The 153 identified *VcLBD* genes were named based on the homology to *AtLBDs*.

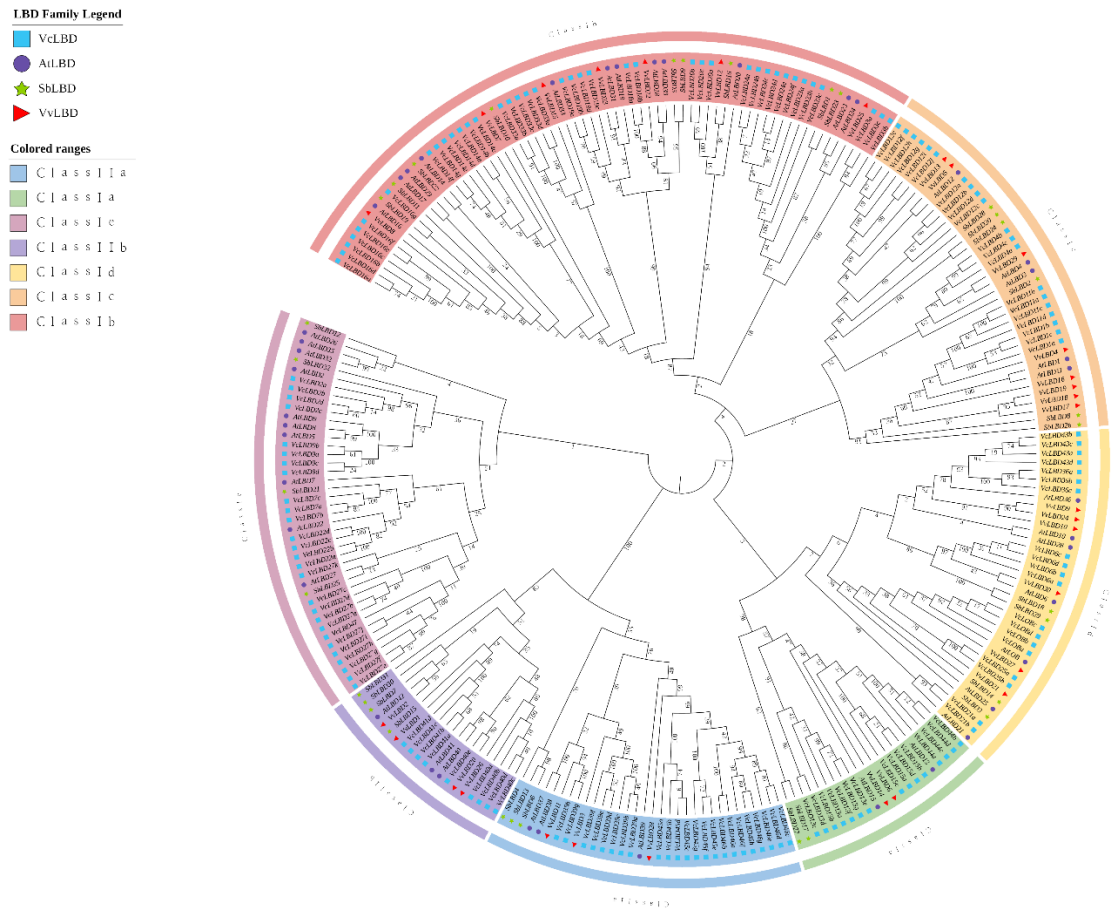

**Fig. S2** Phylogenetic relationship between the *VcLBD* genes and *LBD* genes from other plant species. Sequences of 42 known *Arabidopsis thaliana*, 30 *Vitis vinifera*, and 32 *Sorghum bicolor* *LBD* genes were downloaded from the NCBI ([www.ncbi.nlm.nih.gov](http://www.ncbi.nlm.nih.gov)) and TAIR ([www.arabidopsis.org](http://www.arabidopsis.org)) databases. A maximum likelihood tree of the 153 *LBD* genes coding sequences was generated using MEGA11 software, clustering them into two major categories and seven subcategories (the two main categories are Class I and Class II, with seven subcategories: Class Ia, Class Ib, Class Ic, Class Id, Class Ie, Class IIa, and Class IIb). Class I members typically possess a more complete LOB domain and a C-terminal leucine-zipper-like coiled-coil/dimerization region, while Class II members lack or show a markedly reduced coiled-coil region. Numbers denote bootstrap values calculated based on 1000 repetitions. *LBD* genes from the same species are denoted by identical symbols: blue squares, *Vaccinium corymbosum*; purple circles, *Arabidopsis thaliana*; green pentagrams, *Sorghum bicolor*; red triangles, *Vitis vinifera*.

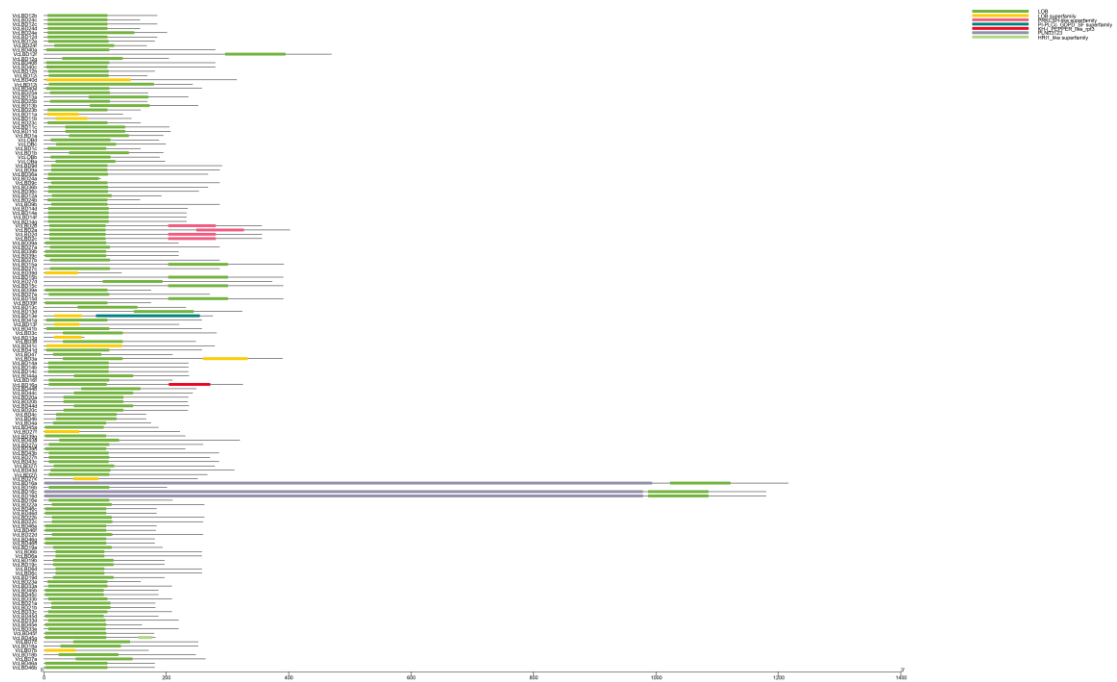

**Fig.S3** Conserved domain architecture of the 153 VcLBD proteins. The length of each protein sequence is represented by a black horizontal line, and the overall sequence-length scale is shown by the gray bar at the bottom. Colored boxes indicate conserved domains: green, LOB domain; yellow, LOB superfamily domain; pink, PRKCSH superfamily domain; teal, SF superfamily domain; red, KHI domain; gray, PLN03123 domain; and light green, HRI1 superfamily domain.
