# Supplementary material
Source: MDPI journal article supplement (doi:10.3390/horticulturae12030311)
Supplement: s1 [file Table.S1.pdf › Table.S1.pdf]

| ID                                      | Most likely Location | Gene name | Scaffold     | start position | end position | sense/antisense strand | Number of Amino Acid | Molecular Weight | Theoretical pI | Instability Index | Aliphatic Index | Grand Average of Hydropathicity |
|-----------------------------------------|----------------------|-----------|--------------|----------------|--------------|------------------------|----------------------|------------------|----------------|-------------------|-----------------|---------------------------------|
| VaccDscff46-processed-gene-99.16-mRNA-1 | Nuclear              | VcLBD11a  | VaccDscff43  | 17579233       | 17579748     | +                      | 129                  | 14474.19         | 4.25           | 61.7              | 65.89           | -0.516                          |
| VaccDscff47-processed-gene-81.24-mRNA-1 | Nuclear              | VcLBD11b  | VaccDscff46  | 9915614        | 9916615      | -                      | 143                  | 16371.41         | 4.63           | 53.53             | 69.65           | -0.548                          |
| VaccDscff22-augustus-gene-266.27-mRNA-1 | Nuclear              | VcLBD11c  | VaccDscff22  | 26640148       | 26642273     | -                      | 205                  | 22519.41         | 5.13           | 73.6              | 64.34           | -0.416                          |
| VaccDscff43-augustus-gene-120.26-mRNA-1 | Nuclear              | VcLBD11d  | VaccDscff41  | 2912271        | 2913164      | +                      | 207                  | 22830.67         | 5.29           | 72.08             | 61.84           | -0.488                          |
| VaccDscff19-augustus-gene-366.31-mRNA-1 | Nuclear              | VcLBD12a  | VaccDscff19  | 36685785       | 36686816     | +                      | 192                  | 21093.07         | 6.98           | 54.48             | 79.27           | -0.137                          |
| VaccDscff24-augustus-gene-66.43-mRNA-1  | Nuclear              | VcLBD12b  | VaccDscff24  | 6190367        | 6192312      | +                      | 185                  | 20240.04         | 6.27           | 54.86             | 78.05           | -0.166                          |
| VaccDscff11-augustus-gene-319.21-mRNA-1 | Nuclear              | VcLBD12c  | VaccDscff11  | 31950617       | 31951637     | -                      | 185                  | 20085.82         | 6.8            | 53.81             | 75.95           | -0.157                          |
| VaccDscff15-augustus-gene-307.19-mRNA-1 | Nuclear              | VcLBD12d  | VaccDscff15  | 30761828       | 30763400     | -                      | 185                  | 20138.88         | 5.87           | 52.02             | 75.95           | -0.176                          |
| VaccDscff28-augustus-gene-319.25-mRNA-1 | Nuclear              | VcLBD12e  | VaccDscff27  | 25934288       | 25936941     | -                      | 181                  | 20120.07         | 6.17           | 45.5              | 81.93           | -0.151                          |
| VaccDscff214-augustus-gene-0.26-mRNA-1  | Nuclear              | VcLBD12f  | VaccDscff214 | 65365          | 73195        | +                      | 470                  | 52972.86         | 4.95           | 62.29             | 69.51           | -0.505                          |
| VaccDscff19-augustus-gene-37.43-mRNA-1  | Nuclear              | VcLBD12g  | VaccDscff19  | 3700394        | 3701396      | -                      | 204                  | 22746.16         | 6.28           | 49.32             | 87.94           | -0.09                           |
| VaccDscff20-snap-gene-36.38-mRNA-1      | Nuclear              | VcLBD12h  | VaccDscff20  | 3678481        | 3679471      | -                      | 181                  | 20178.03         | 5.91           | 43.6              | 81.38           | -0.204                          |
| VaccDscff26-augustus-gene-123.41-mRNA-1 | Nuclear              | VcLBD12i  | VaccDscff25  | 29733419       | 29735048     | -                      | 169                  | 18682.37         | 6.88           | 55.87             | 83.08           | -0.18                           |
| VaccDscff33-snap-gene-217.28-mRNA-1     | Nuclear              | VcLBD12j  | VaccDscff32  | 23670136       | 23674909     | -                      | 243                  | 26992.06         | 8.38           | 47.8              | 94.69           | -0.005                          |
| VaccDscff19-augustus-gene-33.32-mRNA-1  | Nuclear              | VcLBD13a  | VaccDscff19  | 3378333        | 3379599      | +                      | 236                  | 26385.3          | 7.64           | 57.27             | 79.79           | -0.2                            |
| VaccDscff28-augustus-gene-322.39-mRNA-1 | Nuclear              | VcLBD13b  | VaccDscff28  | 31934016       | 31935131     | +                      | 252                  | 27999.05         | 7.66           | 55.33             | 79.01           | -0.194                          |
| VaccDscff20-snap-gene-35.50-mRNA-1      | Nuclear              | VcLBD13c  | VaccDscff20  | 3491678        | 3493339      | +                      | 232                  | 25612.32         | 8.78           | 62.42             | 72.8            | -0.289                          |
| VaccDscff48-augustus-gene-81.38-mRNA-1  | Nuclear              | VcLBD13d  | VaccDscff47  | 16510092       | 16531435     | -                      | 324                  | 36285.12         | 9.07           | 57.77             | 68.4            | -0.488                          |
| VaccDscff4-processed-gene-374.17-mRNA-1 | Extracellular        | VcLBD13e  | VaccDscff4   | 36328960       | 36330626     | +                      | 276                  | 30368.74         | 8.01           | 43.4              | 73.88           | -0.218                          |
| VaccDscff36-processed-gene-55.18-mRNA-1 | Nuclear              | VcLBD13f  | VaccDscff2   | 30285305       | 30286767     | -                      | 221                  | 24741.78         | 9.84           | 71.85             | 86.92           | -0.282                          |
| VaccDscff9-processed-gene-353.12-mRNA-1 | Nuclear              | VcLBD13g  | VaccDscff4   | 37411377       | 37416933     | +                      | 66                   | 7180.45          | 9.44           | 73.4              | 72.58           | 0.105                           |
| VaccDscff43-processed-gene-35.4-mRNA-1  | Nuclear              | VcLBD14a  | VaccDscff43  | 3551122        | 3551922      | -                      | 236                  | 25899.71         | 5.95           | 47.27             | 62.5            | -0.444                          |
| VaccDscff22-processed-gene-337.6-mRNA-1 | Nuclear              | VcLBD14b  | VaccDscff22  | 33770366       | 33771166     | +                      | 236                  | 25875.71         | 6.04           | 46.83             | 62.08           | -0.44                           |

| ID                                       | Most likely Location | Gene name | Scaffold    | start position | end position | sense/antisense strand | Number of Amino Acid | Molecular Weight | Theoretical pI | Instability Index | Aliphatic Index | Grand Average of Hydropathicity |
|------------------------------------------|----------------------|-----------|-------------|----------------|--------------|------------------------|----------------------|------------------|----------------|-------------------|-----------------|---------------------------------|
| VaccDscff46-processed-gene-173.1-mRNA-1  | Nuclear              | VcLBD14c  | VaccDscff46 | 17308084       | 17308884     | +                      | 236                  | 25915.76         | 5.95           | 48.93             | 62.5            | -0.42                           |
| VaccDscff43-augustus-gene-35.18-mRNA-1   | Nuclear              | VcLBD14d  | VaccDscff43 | 12024855       | 12026712     | +                      | 235                  | 25927.86         | 6.29           | 47.36             | 61.91           | -0.411                          |
| VaccDscff46-augustus-gene-173.19-mRNA-1  | Nuclear              | VcLBD14e  | VaccDscff44 | 22827760       | 22830232     | +                      | 233                  | 25811.78         | 5.71           | 53.01             | 62.45           | -0.385                          |
| VaccDscff22-processed-gene-338.1-mRNA-1  | Nuclear              | VcLBD14f  | VaccDscff22 | 33791225       | 33792018     | +                      | 233                  | 25780.75         | 6.2            | 51.48             | 62.88           | -0.395                          |
| VaccDscff47-processed-gene-165.0-mRNA-1  | Nuclear              | VcLBD14g  | VaccDscff47 | 16490213       | 16491006     | +                      | 233                  | 25829.78         | 5.8            | 53                | 62.88           | -0.409                          |
| VaccDscff43-snap-gene-90.31-mRNA-1       | Nuclear              | VcLBD15a  | VaccDscff43 | 7790230        | 7800104      | +                      | 392                  | 42514.12         | 9.64           | 76.52             | 64.21           | -0.51                           |
| VaccDscff43-snap-gene-78.27-mRNA-1       | Nuclear              | VcLBD15b  | VaccDscff43 | 3486856        | 3508162      | +                      | 391                  | 42427.04         | 9.64           | 76.19             | 64.37           | -0.51                           |
| VaccDscff22-snap-gene-299.44-mRNA-1      | Nuclear              | VcLBD15c  | VaccDscff22 | 29967840       | 29978307     | -                      | 391                  | 42414.99         | 9.64           | 75.7              | 63.38           | -0.523                          |
| VaccDscff47-snap-gene-122.46-mRNA-1      | Nuclear              | VcLBD15d  | VaccDscff46 | 17341759       | 17344136     | -                      | 391                  | 42417            | 9.64           | 76.88             | 64.37           | -0.508                          |
| VaccDscff47-snap-gene-165.31-mRNA-1      | Nuclear              | VcLBD16a  | VaccDscff47 | 12215848       | 12225744     | -                      | 1216                 | 136348.65        | 8.73           | 45.69             | 76.76           | -0.478                          |
| VaccDscff46-augustus-gene-173.21-mRNA-1  | Nuclear              | VcLBD16b  | VaccDscff46 | 17328864       | 17329796     | +                      | 201                  | 21988.44         | 7.5            | 59.77             | 80.65           | -0.001                          |
| VaccDscff22-snap-gene-338.36-mRNA-1      | Nuclear              | VcLBD16c  | VaccDscff22 | 33804190       | 33824629     | -                      | 1180                 | 131836.22        | 8.54           | 45.19             | 76.87           | -0.484                          |
| VaccDscff43-snap-gene-35.20-mRNA-1       | Nuclear              | VcLBD16d  | VaccDscff43 | 3520485        | 3521293      | -                      | 1180                 | 131956.46        | 8.65           | 44.98             | 77.03           | -0.483                          |
| VaccDscff11-processed-gene-370.2-mRNA-1  | Nuclear              | VcLBD16e  | VaccDscff11 | 37005016       | 37007208     | -                      | 210                  | 22970.19         | 7.55           | 47.12             | 69.81           | -0.195                          |
| VaccDscff15-processed-gene-362.10-mRNA-1 | Nuclear              | VcLBD16f  | VaccDscff15 | 36256901       | 36259115     | -                      | 210                  | 22944.15         | 7.55           | 46.34             | 70.29           | -0.179                          |
| VaccDscff24-processed-gene-33.4-mRNA-1   | Extracellular        | VcLBD16g  | VaccDscff24 | 3309045        | 3312666      | -                      | 325                  | 34525.71         | 7.03           | 53.08             | 58.98           | -0.375                          |
| VaccDscff22-augustus-gene-36.36-mRNA-1   | Nuclear              | VcLBD18a  | VaccDscff22 | 3660594        | 3667321      | -                      | 252                  | 25971.66         | 7.15           | 68.46             | 78.25           | -0.057                          |
| VaccDscff684-augustus-gene-0.6-mRNA-1    | Nuclear              | VcLBD18b  | VaccDscff62 | 487579         | 491309       | -                      | 248                  | 25713.43         | 7.15           | 68.41             | 79.52           | -0.05                           |
| VaccDscff41-augustus-gene-159.30-mRNA-1  | Nuclear              | VcLBD19a  | VaccDscff40 | 4041717        | 4042335      | +                      | 194                  | 21047.87         | 8.31           | 64.42             | 70.98           | -0.24                           |
| VaccDscff40-snap-gene-170.39-mRNA-1      | Nuclear              | VcLBD19b  | VaccDscff40 | 3982190        | 3983249      | -                      | 197                  | 21349.22         | 7.03           | 66.47             | 74.87           | -0.168                          |
| VaccDscff23-augustus-gene-122.27-mRNA-1  | Nuclear              | VcLBD19c  | VaccDscff23 | 12235676       | 12241039     | -                      | 197                  | 21357.29         | 7.03           | 67.94             | 75.84           | -0.135                          |
| VaccDscff23-augustus-gene-125.22-mRNA-1  | Nuclear              | VcLBD19d  | VaccDscff23 | 12495518       | 12501411     | +                      | 197                  | 21421.31         | 7.03           | 67.7              | 76.35           | -0.152                          |
| VaccDscff15-augustus-gene-291.38-mRNA-1  | Nuclear              | VcLBD1a   | VaccDscff15 | 29184442       | 29187359     | -                      | 195                  | 21101.99         | 5.49           | 67                | 82.15           | -0.122                          |
| VaccDscff24-augustus-gene-95.27-mRNA-1   | Nuclear              | VcLBD1b   | VaccDscff24 | 6600684        | 6601689      | -                      | 195                  | 21114.04         | 5.49           | 67.38             | 84.15           | -0.095                          |

| ID                                     | Most likely Location | Gene name | Scaffold   | start position | end position | sense/antisense strand | Number of Amino Acid | Molecular Weight | Theoretical pI | Instability Index | Aliphatic Index | Grand Average of Hydropathicity |
|----------------------------------------|----------------------|-----------|------------|----------------|--------------|------------------------|----------------------|------------------|----------------|-------------------|-----------------|---------------------------------|
| VaccDscf19-snap-gene-337.60-mRNA-1     | Nuclear              | VcLBD1c   | VaccDscf19 | 33776068       | 33780044     | -                      | 158                  | 17530.07         | 5.1            | 55.14             | 86.58           | -0.152                          |
| VaccDscf26-augustus-gene-295.37-mRNA-1 | Nuclear              | VcLBD20a  | VaccDscf26 | 12290693       | 12292295     | -                      | 236                  | 25540.47         | 7.22           | 57.96             | 71.61           | -0.389                          |
| VaccDscf21-augustus-gene-303.23-mRNA-1 | Nuclear              | VcLBD20b  | VaccDscf21 | 30334872       | 30336767     | -                      | 235                  | 25508.47         | 7.19           | 57.96             | 72.72           | -0.334                          |
| VaccDscf29-augustus-gene-282.21-mRNA-1 | Nuclear              | VcLBD20c  | VaccDscf29 | 14473704       | 14474876     | -                      | 235                  | 25463.47         | 7.17           | 57.04             | 75.62           | -0.317                          |
| VaccDscf19-processed-gene-39.2-mRNA-1  | Chloroplast          | VcLBD21a  | VaccDscf19 | 3911402        | 3911950      | +                      | 182                  | 19934.87         | 8.12           | 54.48             | 77.14           | -0.248                          |
| VaccDscf48-processed-gene-66.17-mRNA-1 | Chloroplast          | VcLBD21b  | VaccDscf47 | 8132469        | 8133424      | -                      | 182                  | 19950.87         | 8.12           | 53.12             | 77.14           | -0.251                          |
| VaccDscf4-augustus-gene-415.29-mRNA-1  | Nuclear              | VcLBD22a  | VaccDscf48 | 8170437        | 8177306      | -                      | 262                  | 29904.39         | 4.88           | 60.47             | 75.23           | -0.639                          |
| VaccDscf36-augustus-gene-12.30-mRNA-1  | Nuclear              | VcLBD22b  | VaccDscf36 | 10881998       | 10883681     | -                      | 262                  | 29935.49         | 4.83           | 63                | 77.1            | -0.624                          |
| VaccDscf27-augustus-gene-351.17-mRNA-1 | Nuclear              | VcLBD22c  | VaccDscf27 | 23389625       | 23391326     | -                      | 260                  | 29624.22         | 5.68           | 55.68             | 75              | -0.678                          |
| VaccDscf34-processed-gene-17.4-mRNA-1  | Nuclear              | VcLBD22d  | VaccDscf34 | 1783719        | 1785799      | +                      | 260                  | 29610.05         | 5.59           | 56.73             | 74.27           | -0.714                          |
| VaccDscf38-snap-gene-210.28-mRNA-1     | Nuclear              | VcLBD23a  | VaccDscf37 | 6894195        | 6895855      | -                      | 158                  | 18171.42         | 7.03           | 63.12             | 70.57           | -0.575                          |
| VaccDscf39-snap-gene-237.29-mRNA-1     | Nuclear              | VcLBD23b  | VaccDscf38 | 20990129       | 20991936     | -                      | 158                  | 18143.36         | 6.64           | 62.64             | 70.57           | -0.569                          |
| VaccDscf37-augustus-gene-69.35-mRNA-1  | Nuclear              | VcLBD23c  | VaccDscf36 | 1278423        | 1281479      | +                      | 158                  | 18112.35         | 6.64           | 62.51             | 70.57           | -0.557                          |
| VaccDscf19-snap-gene-148.30-mRNA-1     | Nuclear              | VcLBD24a  | VaccDscf19 | 14843253       | 14844647     | -                      | 93                   | 10382.87         | 9.41           | 59.76             | 65.27           | -0.36                           |
| VaccDscf15-snap-gene-54.23-mRNA-1      | Nuclear              | VcLBD24b  | VaccDscf24 | 9513682        | 9516311      | +                      | 157                  | 17955.13         | 6.99           | 66.84             | 66.05           | -0.594                          |
| VaccDscf24-snap-gene-322.24-mRNA-1     | Nuclear              | VcLBD24c  | VaccDscf15 | 3122519        | 3124955      | -                      | 157                  | 17944.09         | 6.94           | 70.96             | 67.9            | -0.601                          |
| VaccDscf15-snap-gene-31.32-mRNA-1      | Nuclear              | VcLBD24d  | VaccDscf15 | 5424123        | 5425916      | -                      | 157                  | 18023.19         | 6.4            | 67.58             | 71.02           | -0.563                          |
| VaccDscf11-snap-gene-19.25-mRNA-1      | Nuclear              | VcLBD24e  | VaccDscf11 | 1894522        | 1896908      | -                      | 201                  | 23749.86         | 6.29           | 55.85             | 73.88           | -0.339                          |
| VaccDscf44-snap-gene-228.39-mRNA-1     | Nuclear              | VcLBD24f  | VaccDscf43 | 9029873        | 9040244      | +                      | 168                  | 19244.63         | 7.75           | 64.51             | 70.42           | -0.553                          |
| VaccDscf13-processed-gene-64.6-mRNA-1  | Nuclear              | VcLBD25a  | VaccDscf13 | 6468785        | 6469297      | +                      | 170                  | 18629.98         | 5.91           | 55.95             | 68.88           | -0.418                          |
| VaccDscf30-snap-gene-343.78-mRNA-1     | Nuclear              | VcLBD25b  | VaccDscf30 | 25458612       | 25460212     | -                      | 169                  | 18498.79         | 5.91           | 56.22             | 69.29           | -0.431                          |
| VaccDscf34-augustus-gene-121.32-mRNA-1 | Nuclear              | VcLBD27a  | VaccDscf33 | 21721341       | 21722875     | +                      | 287                  | 32195.79         | 5.2            | 62.57             | 69.72           | -0.605                          |
| VaccDscf17-processed-gene-253.5-mRNA-1 | Nuclear              | VcLBD27b  | VaccDscf17 | 25369294       | 25370820     | +                      | 287                  | 32204.8          | 5.29           | 61.13             | 69.72           | -0.604                          |
| VaccDscf45-processed-gene-231.4-mRNA-1 | Nuclear              | VcLBD27c  | VaccDscf45 | 23123423       | 23124961     | +                      | 287                  | 32183.67         | 5.2            | 63.7              | 69.72           | -0.611                          |

| ID                                     | Most likely Location | Gene name | Scaffold   | start position | end position | sense/antisense strand | Number of Amino Acid | Molecular Weight | Theoretical pI | Instability Index | Aliphatic Index | Grand Average of Hydropathicity |
|----------------------------------------|----------------------|-----------|------------|----------------|--------------|------------------------|----------------------|------------------|----------------|-------------------|-----------------|---------------------------------|
| VaccDscf27-augustus-gene-234.33-mRNA-1 | Nuclear              | VcLBD27d  | VaccDscf27 | 20817843       | 20819782     | +                      | 373                  | 41670.87         | 6.42           | 58.23             | 76.65           | -0.425                          |
| VaccDscf16-augustus-gene-47.39-mRNA-1  | Nuclear              | VcLBD27e  | VaccDscf16 | 4775820        | 4776918      | +                      | 271                  | 31071.78         | 5.55           | 53.31             | 66.94           | -0.589                          |
| VaccDscf7-augustus-gene-376.35-mRNA-1  | Nuclear              | VcLBD27f  | VaccDscf7  | 37592039       | 37593575     | +                      | 222                  | 25534.45         | 5.1            | 45.25             | 71.58           | -0.569                          |
| VaccDscf18-snap-gene-351.45-mRNA-1     | Nuclear              | VcLBD27g  | VaccDscf18 | 35115343       | 35116376     | +                      | 260                  | 29742.17         | 5.56           | 53.95             | 65.27           | -0.66                           |
| VaccDscf7-augustus-gene-376.31-mRNA-1  | Nuclear              | VcLBD27h  | VaccDscf78 | 415247         | 419864       | -                      | 271                  | 31050.82         | 5.45           | 60.52             | 67.68           | -0.58                           |
| VaccDscf16-augustus-gene-48.42-mRNA-1  | Nuclear              | VcLBD27i  | VaccDscf16 | 4838757        | 4839831      | -                      | 279                  | 32058.02         | 5.88           | 56.1              | 64.66           | -0.61                           |
| VaccDscf7-snap-gene-376.45-mRNA-1      | Nuclear              | VcLBD27j  | VaccDscf7  | 37675176       | 37676262     | +                      | 267                  | 30673.45         | 5.8            | 58.3              | 67.6            | -0.59                           |
| VaccDscf4-processed-gene-363.14-mRNA-1 | Nuclear              | VcLBD27k  | VaccDscf4  | 33428720       | 33430335     | +                      | 251                  | 28303.43         | 6.45           | 53.66             | 64.54           | -0.731                          |
| VaccDscf5-snap-gene-311.32-mRNA-1      | Nuclear              | VcLBD2a   | VaccDscf4  | 41533175       | 41535820     | +                      | 402                  | 45236.39         | 8.5            | 43.95             | 73.46           | -0.381                          |
| VaccDscf8-augustus-gene-121.34-mRNA-1  | Nuclear              | VcLBD2b   | VaccDscf7  | 37635450       | 37636538     | +                      | 356                  | 40089.21         | 8.18           | 41.49             | 67.61           | -0.518                          |
| VaccDscf11-augustus-gene-334.29-mRNA-1 | Nuclear              | VcLBD2c   | VaccDscf11 | 33415242       | 33424432     | -                      | 356                  | 39982.1          | 8.01           | 40.98             | 68.15           | -0.528                          |
| VaccDscf10-augustus-gene-100.25-mRNA-1 | Nuclear              | VcLBD2d   | VaccDscf10 | 9984442        | 9995062      | +                      | 356                  | 40031.13         | 8.01           | 38.53             | 67.33           | -0.529                          |
| VaccDscf33-processed-gene-192.3-mRNA-1 | Nuclear              | VcLBD33a  | VaccDscf33 | 19286233       | 19287173     | +                      | 209                  | 23361.14         | 5.94           | 55.89             | 63.49           | -0.432                          |
| VaccDscf29-augustus-gene-144.28-mRNA-1 | Nuclear              | VcLBD33b  | VaccDscf28 | 32201504       | 32202975     | -                      | 209                  | 23335.06         | 5.94           | 56.81             | 61.63           | -0.454                          |
| VaccDscf21-augustus-gene-143.22-mRNA-1 | Nuclear              | VcLBD33c  | VaccDscf21 | 14380314       | 14381562     | -                      | 209                  | 23314.1          | 5.54           | 53.77             | 64.45           | -0.351                          |
| VaccDscf19-processed-gene-49.9-mRNA-1  | Nuclear              | VcLBD33d  | VaccDscf19 | 4971818        | 4972566      | -                      | 220                  | 24044.68         | 4.57           | 53.29             | 73.14           | -0.289                          |
| VaccDscf20-processed-gene-53.9-mRNA-1  | Nuclear              | VcLBD33e  | VaccDscf20 | 5356455        | 5357203      | -                      | 220                  | 24055.75         | 4.64           | 52.9              | 74.91           | -0.265                          |
| VaccDscf31-processed-gene-95.5-mRNA-1  | Nuclear              | VcLBD36a  | VaccDscf31 | 9560810        | 9561709      | +                      | 268                  | 29394.06         | 7.64           | 64.43             | 74.29           | -0.505                          |
| VaccDscf16-processed-gene-185.0-mRNA-1 | Nuclear              | VcLBD36b  | VaccDscf16 | 18473215       | 18474114     | +                      | 268                  | 29404.09         | 7.64           | 65.35             | 74.29           | -0.508                          |
| VaccDscf7-processed-gene-249.7-mRNA-1  | Nuclear              | VcLBD36c  | VaccDscf7  | 24963584       | 24964345     | -                      | 253                  | 28010.62         | 7.64           | 68.18             | 76.36           | -0.502                          |
| VaccDscf3-augustus-gene-10.22-mRNA-1   | Nuclear              | VcLBD39a  | VaccDscf39 | 23733303       | 23735110     | +                      | 220                  | 23859.95         | 8.94           | 63.83             | 68.32           | -0.383                          |
| VaccDscf14-augustus-gene-349.30-mRNA-1 | Nuclear              | VcLBD39b  | VaccDscf14 | 34909368       | 34911547     | +                      | 220                  | 23875.91         | 8.53           | 62.44             | 68.32           | -0.365                          |
| VaccDscf2-augustus-gene-402.43-mRNA-1  | Nuclear              | VcLBD39c  | VaccDscf29 | 28221645       | 28223473     | -                      | 220                  | 23945.94         | 8.21           | 63.34             | 69.64           | -0.379                          |
| VaccDscf17-processed-gene-227.1-mRNA-1 | Extracellular        | VcLBD39d  | VaccDscf17 | 22734529       | 22736176     | +                      | 127                  | 13628.35         | 4.79           | 73.18             | 87.56           | -0.006                          |

| ID                                     | Most likely Location | Gene name | Scaffold   | start position | end position | sense/antisense strand | Number of Amino Acid | Molecular Weight | Theoretical pI | Instability Index | Aliphatic Index | Grand Average of Hydropathicity |
|----------------------------------------|----------------------|-----------|------------|----------------|--------------|------------------------|----------------------|------------------|----------------|-------------------|-----------------|---------------------------------|
| VaccDscf27-augustus-gene-208.18-mRNA-1 | Extracellular        | VcLBD39e  | VaccDscf26 | 29580191       | 29582267     | -                      | 175                  | 18771.26         | 5.16           | 69.2              | 90.91           | 0.049                           |
| VaccDscf34-augustus-gene-147.23-mRNA-1 | Extracellular        | VcLBD39f  | VaccDscf34 | 12156046       | 12157553     | -                      | 175                  | 18757.23         | 5.14           | 67.24             | 90.91           | 0.049                           |
| VaccDscf32-augustus-gene-258.34-mRNA-1 | Extracellular        | VcLBD39g  | VaccDscf30 | 34407283       | 34409917     | -                      | 231                  | 24819.9          | 5.29           | 67.09             | 72.16           | -0.281                          |
| VaccDscf30-augustus-gene-254.23-mRNA-1 | Extracellular        | VcLBD39h  | VaccDscf2  | 40282107       | 40284102     | +                      | 231                  | 24796.86         | 5.29           | 67.45             | 72.16           | -0.265                          |
| VaccDscf24-snap-gene-56.35-mRNA-1      | Nuclear              | VcLBD3a   | VaccDscf24 | 32263197       | 32264965     | -                      | 390                  | 43172.7          | 5.83           | 50.66             | 88.08           | -0.063                          |
| VaccDscf15-augustus-gene-334.23-mRNA-1 | Chloroplast          | VcLBD3b   | VaccDscf15 | 33449092       | 33452710     | +                      | 248                  | 26788.73         | 6.52           | 52.4              | 83.06           | -0.052                          |
| VaccDscf11-augustus-gene-345.33-mRNA-1 | Nuclear              | VcLBD3c   | VaccDscf11 | 34524936       | 34528559     | +                      | 282                  | 30839.45         | 5.63           | 53.45             | 85.85           | -0.039                          |
| VaccDscf36-augustus-gene-108.31-mRNA-1 | Chloroplast          | VcLBD40a  | VaccDscf35 | 24238140       | 24239924     | +                      | 280                  | 29504.37         | 7.51           | 46.52             | 78.43           | -0.275                          |
| VaccDscf9-augustus-gene-311.38-mRNA-1  | Chloroplast          | VcLBD40b  | VaccDscf8  | 12160339       | 12172844     | +                      | 280                  | 29511.31         | 7.51           | 43.61             | 78.43           | -0.279                          |
| VaccDscf35-augustus-gene-242.35-mRNA-1 | Nuclear              | VcLBD40c  | VaccDscf34 | 14711772       | 14713294     | -                      | 280                  | 29477.3          | 7.51           | 47.76             | 78.43           | -0.29                           |
| VaccDscf4-processed-gene-334.14-mRNA-1 | Chloroplast          | VcLBD40d  | VaccDscf48 | 6643663        | 6644211      | +                      | 315                  | 33558.1          | 6.94           | 48.44             | 80.86           | -0.198                          |
| VaccDscf13-augustus-gene-98.29-mRNA-1  | Nuclear              | VcLBD40e  | VaccDscf13 | 9799790        | 9801163      | -                      | 258                  | 27993.39         | 6.32           | 42.8              | 77.91           | -0.441                          |
| VaccDscf25-augustus-gene-297.32-mRNA-1 | Nuclear              | VcLBD41a  | VaccDscf24 | 5599638        | 5603042      | -                      | 258                  | 28334.1          | 7.53           | 53.56             | 89.11           | -0.281                          |
| VaccDscf3-augustus-gene-111.23-mRNA-1  | Nuclear              | VcLBD41b  | VaccDscf3  | 1021555        | 1024045      | -                      | 258                  | 28191.93         | 6.89           | 53.32             | 91.01           | -0.249                          |
| VaccDscf2-processed-gene-302.36-mRNA-1 | Nuclear              | VcLBD41c  | VaccDscf22 | 20210108       | 20210866     | +                      | 279                  | 30467.53         | 8.58           | 47.32             | 90.43           | -0.286                          |
| VaccDscf14-augustus-gene-256.33-mRNA-1 | Nuclear              | VcLBD41d  | VaccDscf14 | 25618541       | 25620130     | -                      | 258                  | 28177.95         | 8.07           | 50.54             | 89.5            | -0.278                          |
| VaccDscf13-augustus-gene-133.22-mRNA-1 | Nuclear              | VcLBD43a  | VaccDscf13 | 13338778       | 13344767     | +                      | 320                  | 35571.99         | 8.22           | 71.19             | 66.19           | -0.655                          |
| VaccDscf42-processed-gene-66.5-mRNA-1  | Nuclear              | VcLBD43b  | VaccDscf42 | 6679183        | 6680043      | +                      | 286                  | 32084.97         | 7.73           | 71.13             | 65.91           | -0.726                          |
| VaccDscf30-processed-gene-232.0-mRNA-1 | Nuclear              | VcLBD43c  | VaccDscf30 | 23194583       | 23195443     | -                      | 286                  | 32065.93         | 7.23           | 69.6              | 65.91           | -0.721                          |
| VaccDscf32-snap-gene-236.36-mRNA-1     | Nuclear              | VcLBD43d  | VaccDscf32 | 4397650        | 4402831      | -                      | 311                  | 35267.56         | 8.51           | 65.65             | 62.8            | -0.755                          |
| VaccDscf15-snap-gene-302.37-mRNA-1     | Nuclear              | VcLBD44a  | VaccDscf15 | 30261926       | 30263698     | +                      | 237                  | 25765.3          | 7.6            | 73.02             | 74.56           | -0.29                           |
| VaccDscf19-augustus-gene-371.24-mRNA-1 | Nuclear              | VcLBD44b  | VaccDscf19 | 37092568       | 37094196     | -                      | 249                  | 27248.13         | 6.91           | 65.38             | 78.76           | -0.107                          |
| VaccDscf11-augustus-gene-315.23-mRNA-1 | Nuclear              | VcLBD44c  | VaccDscf11 | 31538676       | 31540458     | +                      | 243                  | 26458.97         | 6.17           | 71.78             | 69.51           | -0.348                          |
| VaccDscf24-augustus-gene-62.35-mRNA-1  | Nuclear              | VcLBD44d  | VaccDscf23 | 30187058       | 30188122     | +                      | 237                  | 25769.28         | 6.74           | 71.45             | 74.14           | -0.289                          |

| ID                                     | Most likely Location | Gene name | Scaffold    | start position | end position | sense/antisense strand | Number of Amino Acid | Molecular Weight | Theoretical pI | Instability Index | Aliphatic Index | Grand Average of Hydropathicity |
|----------------------------------------|----------------------|-----------|-------------|----------------|--------------|------------------------|----------------------|------------------|----------------|-------------------|-----------------|---------------------------------|
| VaccDscf23-augustus-gene-301.29-mRNA-1 | Extracellular        | VcLBD45a  | VaccDscf23  | 30153582       | 30154617     | +                      | 187                  | 20449.17         | 8.17           | 57.72             | 74.6            | -0.199                          |
| VaccDscf41-augustus-gene-28.21-mRNA-1  | Extracellular        | VcLBD45b  | VaccDscf41  | 2848892        | 2849977      | +                      | 187                  | 20424.18         | 8.17           | 62.22             | 73.05           | -0.195                          |
| VaccDscf40-augustus-gene-39.39-mRNA-1  | Extracellular        | VcLBD45c  | VaccDscf3   | 11112905       | 11114610     | +                      | 187                  | 20400.16         | 8.17           | 60.56             | 75.13           | -0.197                          |
| VaccDscf12-augustus-gene-111.26-mRNA-1 | Extracellular        | VcLBD45d  | VaccDscf12  | 11128672       | 11129723     | -                      | 187                  | 20374.17         | 8.17           | 64.97             | 75.13           | -0.164                          |
| VaccDscf40-snap-gene-40.23-mRNA-1      | Extracellular        | VcLBD45e  | VaccDscf40  | 3962918        | 3964030      | -                      | 160                  | 17376.64         | 8.19           | 67.67             | 78.75           | -0.182                          |
| VaccDscf12-snap-gene-111.30-mRNA-1     | Extracellular        | VcLBD45f  | VaccDscf12  | 11181816       | 11182931     | +                      | 180                  | 19556.12         | 8.73           | 67.02             | 74.89           | -0.231                          |
| VaccDscf23-processed-gene-300.4-mRNA-1 | Extracellular        | VcLBD45g  | VaccDscf23  | 30086430       | 30089181     | -                      | 182                  | 19790.28         | 5.54           | 68.67             | 78.85           | -0.182                          |
| VaccDscf41-augustus-gene-28.20-mRNA-1  | Extracellular        | VcLBD46a  | VaccDscf41  | 15904679       | 15910033     | -                      | 181                  | 19578.32         | 5.36           | 66.47             | 81.82           | 0.001                           |
| VaccDscf23-augustus-gene-301.28-mRNA-1 | Extracellular        | VcLBD46b  | VaccDscf23  | 30122796       | 30123877     | +                      | 181                  | 19562.28         | 5.36           | 67.43             | 79.67           | -0.029                          |
| VaccDscf41-augustus-gene-29.36-mRNA-1  | Extracellular        | VcLBD46c  | VaccDscf41  | 2879955        | 2881149      | +                      | 184                  | 20124.71         | 5.18           | 64.86             | 78.42           | -0.126                          |
| VaccDscf40-snap-gene-39.47-mRNA-1      | Extracellular        | VcLBD46d  | VaccDscf40  | 17012017       | 17017417     | -                      | 184                  | 20148.7          | 5.38           | 63.83             | 76.3            | -0.164                          |
| VaccDscf23-processed-gene-301.5-mRNA-1 | Extracellular        | VcLBD46e  | VaccDscf23  | 30171265       | 30172349     | +                      | 184                  | 20139.77         | 5.18           | 59.68             | 80.54           | -0.104                          |
| VaccDscf12-augustus-gene-111.25-mRNA-1 | Extracellular        | VcLBD46f  | VaccDscf12  | 11095696       | 11096590     | -                      | 183                  | 19940.38         | 5.21           | 68.46             | 76.78           | -0.232                          |
| VaccDscf41-augustus-gene-29.37-mRNA-1  | Extracellular        | VcLBD46g  | VaccDscf41  | 2899257        | 2900407      | +                      | 181                  | 19709.21         | 5.44           | 64.88             | 79.72           | -0.154                          |
| VaccDscf23-augustus-gene-301.30-mRNA-1 | Extracellular        | VcLBD46h  | VaccDscf9   | 35317156       | 35319342     | +                      | 181                  | 19667.09         | 5.18           | 66.73             | 78.67           | -0.165                          |
| VaccDscf32-augustus-gene-44.34-mRNA-1  | Nuclear              | VcLBD47   | VaccDscf32  | 25841623       | 25843383     | -                      | 210                  | 23247.34         | 5.81           | 43.2              | 96.95           | -0.1                            |
| VaccDscf701-augustus-gene-0.11-mRNA-1  | Nuclear              | VcLBD4a   | VaccDscf684 | 1017           | 9964         | +                      | 175                  | 19164.91         | 8.57           | 59.93             | 69.66           | -0.282                          |
| VaccDscf78-augustus-gene-4.25-mRNA-1   | Nuclear              | VcLBD4b   | VaccDscf701 | 17668          | 21162        | +                      | 167                  | 18124.77         | 7.66           | 59.18             | 73.65           | -0.174                          |
| VaccDscf62-augustus-gene-5.25-mRNA-1   | Nuclear              | VcLBD4c   | VaccDscf5   | 31157447       | 31167124     | -                      | 167                  | 18092.71         | 7.66           | 58.28             | 75.39           | -0.16                           |
| VaccDscf184-processed-gene-0.1-mRNA-1  | Nuclear              | VcLBD6a   | VaccDscf184 | 12343          | 13119        | +                      | 258                  | 27835.95         | 7.74           | 51.58             | 70.85           | -0.436                          |
| VaccDscf109-processed-gene-4.4-mRNA-1  | Nuclear              | VcLBD6b   | VaccDscf109 | 455630         | 456406       | +                      | 258                  | 27912.13         | 7.74           | 51.73             | 70.08           | -0.426                          |
| VaccDscf533-processed-gene-0.0-mRNA-1  | Nuclear              | VcLBD6c   | VaccDscf533 | 37106          | 37882        | -                      | 258                  | 27983.21         | 8.23           | 53.76             | 69.34           | -0.452                          |
| VaccDscf27-processed-gene-175.6-mRNA-1 | Nuclear              | VcLBD6d   | VaccDscf27  | 17551530       | 17552306     | -                      | 258                  | 27968.1          | 7.73           | 51.46             | 66.32           | -0.436                          |
| VaccDscf182-processed-gene-0.9-mRNA-1  | Nuclear              | VcLBD7a   | VaccDscf182 | 82125          | 82919        | -                      | 264                  | 29082.9          | 8.14           | 60.95             | 80.15           | -0.405                          |

| ID                                      | Most likely Location | Gene name | Scaffold    | start position | end position | sense/antisense strand | Number of Amino Acid | Molecular Weight | Theoretical pI | Instability Index | Aliphatic Index | Grand Average of Hydropathicity |
|-----------------------------------------|----------------------|-----------|-------------|----------------|--------------|------------------------|----------------------|------------------|----------------|-------------------|-----------------|---------------------------------|
| VaccDscf43-processed-gene-175.15-mRNA-1 | Cytoplasmic          | VcLBD7b   | VaccDscf36  | 5543638        | 5549285      | -                      | 171                  | 18919.3          | 4.68           | 47.64             | 91.17           | -0.293                          |
| VaccDscf22-processed-gene-202.17-mRNA-1 | Nuclear              | VcLBD7c   | VaccDscf9   | 31172964       | 31174966     | +                      | 252                  | 27751.42         | 8.14           | 61.68             | 76.23           | -0.425                          |
| VaccDscf11-processed-gene-150.9-mRNA-1  | Nuclear              | VcLBD9a   | VaccDscf11  | 15008842       | 15009705     | -                      | 287                  | 31979.15         | 8.32           | 61.45             | 50.24           | -0.801                          |
| VaccDscf271-processed-gene-0.10-mRNA-1  | Nuclear              | VcLBD9b   | VaccDscf271 | 11816          | 12679        | -                      | 287                  | 31998.19         | 8.65           | 62.38             | 50.24           | -0.806                          |
| VaccDscf24-processed-gene-246.0-mRNA-1  | Nuclear              | VcLBD9c   | VaccDscf24  | 24599602       | 24600465     | +                      | 287                  | 31982.23         | 8.64           | 61.36             | 51.92           | -0.779                          |
| VaccDscf312-processed-gene-0.5-mRNA-1   | Nuclear              | VcLBD9d   | VaccDscf312 | 116275         | 117150       | +                      | 291                  | 32617.83         | 8.62           | 58.27             | 46.53           | -0.891                          |
| VaccDscf34-processed-gene-93.1-mRNA-1   | Nuclear              | VcLOBa    | VaccDscf34  | 9298729        | 9302983      | +                      | 198                  | 21045.83         | 6.28           | 56.85             | 71.46           | -0.249                          |
| VaccDscf17-processed-gene-286.7-mRNA-1  | Nuclear              | VcLOBb    | VaccDscf17  | 28650232       | 28650801     | -                      | 189                  | 20144.82         | 7.57           | 60.02             | 69.74           | -0.276                          |
| VaccDscf27-snap-gene-259.34-mRNA-1      | Nuclear              | VcLOBc    | VaccDscf27  | 35116272       | 35118259     | +                      | 199                  | 21201.07         | 7.57           | 63.24             | 70.65           | -0.259                          |
| VaccDscf27-processed-gene-357.1-mRNA-1  | Nuclear              | VcLOBd    | VaccDscf27  | 35706917       | 35707483     | +                      | 188                  | 20129.85         | 7.57           | 57.86             | 71.65           | -0.251                          |
