# Supplementary material
Source: MDPI journal article supplement (doi:10.3390/horticulturae12030311)
Supplement: s1 [file Table.S2.pdf › Table.S2.pdf]

| Gene ID     | Sequence                  |
|-------------|---------------------------|
| VcLBD41q-F  | TCCTCAACCTCATCAATGCC      |
| VcLBD41q-R  | TCATCGACTTGCTTGAGAGGC     |
| VcLBD11q-F  | GAACTCCCAGAGTCTCAAAGGGC   |
| VcLBD11q-R  | GTTGAGCTTGGAGCTCACAGACT   |
| VcLBD6q-F   | AAGTGTTTGGGGCAAGCAAC      |
| VcLBD6q-R   | ACGCATATCGGCTTCGTAGG      |
| VcLBD40q-F  | GCCACCGTTTTCTCGCCAA       |
| VcLBD40q-R  | CAAGCCAGCCGAGCCGTAGAT     |
| VcLBD40eq-F | TACGAGGCATGTGGGAGGAT      |
| VcLBD40eq-R | AGGCTATTGGGGTAATCAGAGC    |
| VcLBD16bq-F | CATCGATGGAGTGAGAATGC      |
| VcLBD16bq-R | GCCAGTTCTTGAAGCTCACC      |
| VcLBD16gq-F | CGGCAATTCATAAGGTGTTTG     |
| VcLBD16gq-R | GCAACACATCCGTAAACAGG      |
| VcLBD46aq-F | GAATCGTAACACCGCAGACCGAG   |
| VcLBD46aq-R | GTCGAAGCTGATCAACACCCCC    |
| VcLBD46bq-F | ATCGGTGGCGGAATCGTAACAC    |
| VcLBD46bq-R | AAGCTGATCAACACCCCCGATTC   |
| VcLBD46hq-F | AGACCGACGAAGCATCTGAGGC    |
| VcLBD46hq-R | GCCGTCAAAGCTGATCAACACCTC  |
| VcLBD19bq-F | TCCTTCACCGGCAAATCTTCAGAC  |
| VcLBD19bq-R | TGAAGATCGCCATCCTCGGTG     |
| VcLBD33cq-F | AGTCAAGAACTCCACCGTTGTTCC  |
| VcLBD33cq-R | AGATCCCTTGGTCAAATCCTTCGG  |
| VcLBD45aq-F | CGGAGGCTTTTCGTTCTGCTAAG   |
| VcLBD45aq-R | GATGAGTTGAATGATACCGTCACCG |
| VcLBD41bq-F | ACTCGGTTCTCGGTATCCGGGT    |
| VcLBD41bq-R | TTTCACAACCCGATTCGCCAG     |
| VcLBD39aq-F | TTTTCCGGCGATGACGACG       |
| VcLBD39aq-R | CCTTCGTCTCCCTTTCTCCTTGTA  |
| VcLBD39bq-F | ACACCGTCGTTGAACTCGG       |
| VcLBD39bq-R | GAATAGTCTCAAAACCTTCGTCCC  |
| VcLBD39cq-F | GCGCCTCCGATACTAACAACAAC   |
| VcLBD39cq-R | ACGTCGTTATCGCCGAAAACC     |
| VcLBD39dq-F | TCCTAGGCGGCGTATTACAACC    |
| VcLBD39dq-R | ACTCCTCCGCCGCATTACAC      |
| VcLBD39eq-F | AATTCGACTACGCCTCGAAC      |
| VcLBD39eq-R | CGTCGGGTTTGTTGATACC       |
| VcLBD39hq-F | GATCGGGATCCGAGCCCTA       |
| VcLBD39hq-R | CATCTCGCCGCTTCTCGCTT      |
| VcLBD16cq-F | GCCTGATGGTCAAGGTGCTA      |
| VcLBD16cq-R | GTTGTTTGTCACCTCCTTTGG     |
| VcLBD25aq-F | GCGTACGAGGCAGAGGCG        |

|             |                          |
|-------------|--------------------------|
| VcLBD25aq-R | GATTGGCATTGGTGGCATCC     |
| VcLBD2cq-F  | CAAGAGCCAGTATGGACAAGTTCC |
| VcLBD2cq-R  | GAGTGCTGGAATCTGCAACTGAAC |
| VcLBD12eq-F | ATGGCAGAGAGAGAAGGAGG     |
| VcLBD12eq-R | GGTGTCTCAGCTTCAAATGCA    |

---
